# Supplementary material
Source: PubMed Central journal article supplement (PMC9094061)
Supplement: NIHMS1798197-supplement-1.pdf [file NIHMS1798197-supplement-1.pdf]

**Supplementary Material**

**Table S1. Patient Disposition for Total Population and Expansion Cohort of Patients With Advanced Solid Tumors**

|                                  | Total Population                                 |                                                          | Expansion Cohort (melanoma only) <sup>c</sup> |                             |
|----------------------------------|--------------------------------------------------|----------------------------------------------------------|-----------------------------------------------|-----------------------------|
|                                  | Monotherapy<br>Arm <sup>a</sup><br><i>n</i> = 48 | Combination<br>Therapy Arm <sup>b</sup><br><i>n</i> = 65 | ICI Naive<br><i>n</i> = 13                    | ICI Treated<br><i>n</i> = 7 |
| Completed                        | 13 (27.1)                                        | 2 (3.1)                                                  | 0                                             | 0                           |
| Discontinued                     | 35 (72.9)                                        | 63 (96.9)                                                | 13 (100)                                      | 7 (100)                     |
| Adverse event                    | 2 (4.2)                                          | 8 (12.3)                                                 | 3 (23.1)                                      | 0                           |
| Disease progression <sup>d</sup> | 29 (60.4)                                        | 41 (63.1)                                                | 4 (30.8)                                      | 6 (85.7)                    |
| Physician decision               | 1 (2.1)                                          | 6 (9.2)                                                  | 2 (15.4)                                      | 1 (14.3)                    |
| Study terminated by              | 0                                                | 4 (6.2)                                                  | 4 (30.8)                                      | 0                           |

|                       |         |         |   |  |   |
|-----------------------|---------|---------|---|--|---|
| sponsor <sup>e</sup>  |         |         |   |  |   |
| Withdrawal by patient | 3 (6.3) | 4 (6.2) | 0 |  | 0 |

Abbreviation: ICI, immune checkpoint inhibitor.

<sup>a</sup>Includes all patients from the dose acceleration, dose escalation, and dose confirmation phases.

<sup>b</sup>Includes all patients from the dose escalation/confirmation cohort and the expansion cohort.

<sup>c</sup>Subset of the 65 patients in the combination arm.

<sup>d</sup>Defined as clinical progression or progressive disease.

<sup>e</sup>Patients were transferred to the follow-up study with the option to complete therapy with pembrolizumab according to the protocol.

**Table S2. Geometric Mean Serum Pharmacokinetic Parameters of MK-4166 in Cycle 1 When Administered Alone (Monotherapy Arm) or in Combination With Pembrolizumab (Combination Therapy Arm) in Patients With Advanced Solid Tumors**

| Geometric Mean, %GCV <sup>a</sup>        |          |                          |                                      |                         |                                     |                     |           |
|------------------------------------------|----------|--------------------------|--------------------------------------|-------------------------|-------------------------------------|---------------------|-----------|
| MK-4166<br>Dose, mg                      | <i>n</i> | C <sub>max</sub> , ng/mL | T <sub>max</sub> , <sup>b</sup> days | t <sub>1/2</sub> , days | AUC <sub>0-21</sub> ,<br>days·ng/mL | Clearance,<br>L/day | Volume, L |
| <b>MK-4166 Monotherapy<sup>c,d</sup></b> |          |                          |                                      |                         |                                     |                     |           |
| 0.0015                                   | 1        | 0.536                    | 0.96 (0.96–0.96)                     | 2.61                    | 1.08                                | 1.38                | 5.19      |
| 0.0045                                   | 1        | 5.18                     | 0.03 (0.03–0.03)                     | 2.74                    | 3.91                                | 1.15                | 4.55      |
| 0.014                                    | 1        | 17.3                     | 0.03 (0.03–0.03)                     | 2.68                    | 24.7                                | 0.565               | 2.18      |
| 0.04                                     | 1        | 21.1                     | 0.03 (0.03–0.03)                     | 3.48                    | 39.0                                | 1.02                | 5.11      |
| 0.12                                     | 1        | 34.3                     | 0.03 (0.03–0.03)                     | 2.73                    | 69.4                                | 1.73                | 6.80      |
| 0.37                                     | 1        | 205                      | 0.03 (0.03–0.03)                     | 2.10                    | 672                                 | 0.550               | 1.67      |
| 1.1                                      | 1        | 585                      | 0.08 (0.08–0.08)                     | 3.39                    | 3140                                | 0.344               | 1.68      |
| 3.3                                      | 1        | 1,580                    | 0.02 (0.02–0.02)                     | 3.30                    | 8300                                | 0.392               | 1.87      |
| 10                                       | 1        | 3,550                    | 0.08 (0.08–0.08)                     | 7.62                    | 19,100                              | 0.341               | 3.74      |

|                                              |   |                |                  |              |                  |              |              |
|----------------------------------------------|---|----------------|------------------|--------------|------------------|--------------|--------------|
| 30                                           | 6 | 10,900 (37.1)  | 0.05 (0.02–0.08) | 7.77 (67.2)  | 84,700 (36.5)    | 0.286 (54.0) | 3.20 (32.6)  |
| 42                                           | 3 | 12,300 (21.8)  | 0.03 (0.02–0.08) | 7.49 (107.2) | 111,000 (32.9)   | 0.299 (55.5) | 3.23 (48.9)  |
| 59                                           | 3 | 21,800 (13.3)  | 0.02 (0.02–0.03) | 2.93 (85.2)  | 142,000 (31.1)   | 0.400 (37.7) | 1.69 (49.7)  |
| 82                                           | 3 | 23,300 (40.7)  | 0.02 (0.02–0.03) | 12.8 (27.6)  | 226,000 (46.3)   | 0.246 (59.5) | 4.56 (35.4)  |
| 120                                          | 3 | 38,100 (28.5)  | 0.03 (0.02–0.07) | 6.37 (87.7)  | 291,000 (39.6)   | 0.348 (54.4) | 3.19 (69.7)  |
| 170                                          | 3 | 58,600 (16.2)  | 0.03 (0.02–0.03) | 7.66 (31.4)  | 457,000 (23.3)   | 0.305 (31.1) | 3.37 (19.3)  |
| 240                                          | 5 | 68,600 (25.1)  | 0.03 (0.02–1.10) | 5.17 (126.5) | 426,000 (30.4)   | 0.479 (51.5) | 3.57 (79.9)  |
| 340                                          | 4 | 96,500 (25.8)  | 0.02 (0.02–1.11) | 12.0 (69.2)  | 770,000 (59.0)   | 0.304 (67.1) | 5.27 (67.9)  |
| 480                                          | 3 | 149,000 (16.6) | 0.03 (0.02–0.08) | 11.3 (22.7)  | 1,110,000 (21.4) | 0.320 (17.2) | 5.21 (34.4)  |
| 670                                          | 3 | 195,000 (44.4) | 0.02 (0.02–0.08) | 13.1 (37.2)  | 1,730,000 (28.7) | 0.259 (9.9)  | 4.92 (48.4)  |
| 900                                          | 3 | 301,000 (18.8) | 0.08 (0.02–1.06) | 12.3 (4.5)   | 3,110,000 (17.5) | 0.199 (19.2) | 3.54 (17.1)  |
| <b>MK-4166 + Pembrolizumab<sup>c,d</sup></b> |   |                |                  |              |                  |              |              |
| 1.1                                          | 3 | 1790 (16.6)    | 0.03 (0.03–0.08) | 2.86 (9.63)  | 7700 (32.6)      | 0.142 (32.8) | 0.587 (30.2) |
| 3.3                                          | 4 | 3670 (72.9)    | 0.03 (0.03–0.08) | 3.64 (27.7)  | 19,900 (87.1)    | 0.161 (89.4) | 0.844 (55.6) |
| 10                                           | 3 | 5010 (39.7)    | 0.08 (0.03–0.09) | 6.15 (78.5)  | 33,800 (89.1)    | 0.249 (122)  | 2.21 (33.9)  |
| 30                                           | 3 | 16,300 (32.2)  | 0.08 (0.03–0.09) | 12.0 (60.9)  | 137,000 (41.4)   | 0.150 (74.4) | 2.61 (10.8)  |

|     |    |                |                  |                          |                              |                           |                          |
|-----|----|----------------|------------------|--------------------------|------------------------------|---------------------------|--------------------------|
| 42  | 3  | 16,900 (51.1)  | 0.02 (0.02–0.08) | 7.31 (48.9)              | 119,000 (71.4)               | 0.296 (90.1)              | 3.12 (46.6)              |
| 59  | 3  | 20,400 (5.75)  | 0.03 (0.02–0.08) | 8.60 (66.6)              | 147,000 (25.9)               | 0.315 (46.0)              | 3.91 (22.6)              |
| 82  | 4  | 26,300 (32.1)  | 0.04 (0.02–0.08) | 8.84 (14.3) <sup>e</sup> | 271,000 (25.0) <sup>e</sup>  | 0.244 (23.4) <sup>e</sup> | 3.11 (28.8) <sup>e</sup> |
| 120 | 3  | 28,300 (44.5)  | 0.03 (0.02–0.09) | 10.9 (28.8)              | 248,000 (57.6)               | 0.302 (51.3)              | 4.73 (21.2)              |
| 170 | 3  | 552,00 (17.2)  | 0.08 (0.02–0.08) | 11.9 (12.0)              | 516,000 (21.1)               | 0.233 (15.9)              | 4.01 (27.1)              |
| 240 | 3  | 859,00 (12.7)  | 0.04 (0.03–0.08) | 13.0 (10.6)              | 832,000 (11.4)               | 0.193 (12.4)              | 3.62 (14.0)              |
| 340 | 3  | 109,000 (8.9)  | 0.03 (0.02–0.09) | 7.81 (120.0)             | 986,000 (26.2)               | 0.262 (52.3)              | 2.95 (48.8)              |
| 480 | 3  | 144,000 (2.8)  | 0.08 (0.02–0.09) | 13.4 (37.4) <sup>f</sup> | 1,370,000 (7.7) <sup>f</sup> | 0.230 (26.2) <sup>f</sup> | 4.44 (10.4) <sup>f</sup> |
| 670 | 4  | 210,000 (11.8) | 0.05 (0.02–0.13) | 9.03 (77.4)              | 1,740,000 (50.3)             | 0.287 (77.0)              | 3.74 (1.0)               |
| 900 | 23 | 234,000 (22.7) | 0.08 (0.02–0.13) | 12.0 (70.1)              | 2,130,000 (27.5)             | 0.279 (40.9)              | 4.85 (38.1)              |

Abbreviations: AUC<sub>0-21</sub>, area under the curve from time 0 to 21 hours; C<sub>max</sub>, maximum serum concentration; GCV, geometric coefficient of variation; t<sub>1/2</sub>, half-life; T<sub>max</sub>, time to maximum concentration.

<sup>a</sup>%GCV values were not reported when  $n < 2$ .

<sup>b</sup>Median (min–max).

<sup>c</sup>Hemolyzed samples were demonstrated to have an impact on the quantitation of MK-4166 levels in human serum using an ultra-sensitive Singulex platform in a method validation study. Therefore, the patients with hemolyzed samples analyzed using this method are removed from the analysis.

<sup>d</sup>A few samples were analyzed outside of stability. Therefore, these samples were excluded from the analysis.

<sup>e</sup> $n = 3$ .

<sup>f</sup> $n = 2$ .

**Table S3. Baseline Characteristics of the Expansion Cohort of Patients With Advanced Melanoma**

| Characteristic                                        | ICI naive     | ICI treated  |
|-------------------------------------------------------|---------------|--------------|
|                                                       | <i>n</i> = 13 | <i>n</i> = 7 |
| Age, median (range), years                            | 63.0 (42-81)  | 74.0 (48-82) |
| Male, <i>n</i> (%)                                    | 10 (76.9)     | 5 (71.4)     |
| ECOG PS, <i>n</i> (%)                                 |               |              |
| 0                                                     | 11 (84.6)     | 5 (71.4)     |
| 1                                                     | 2 (15.4)      | 2 (28.6)     |
| Elevated baseline lactate dehydrogenase, <i>n</i> (%) | 3 (23.1)      | 4 (57.1)     |
| Baseline tumor size, median (min, max), mm*           | 23 (10, 184)  | 80 (11, 211) |
| Prior lines of therapy, <i>n</i> (%)                  |               |              |
| 0                                                     | 10 (76.9)     | 0            |
| 1                                                     | 3 (23.1)      | 3 (42.9)     |
| ≥2                                                    | 0             | 4 (57.1)     |

Abbreviations: ECOG PS, Eastern Cooperative Oncology Group performance status; ICI, immune checkpoint inhibitor; RECIST v1.1, Response Evaluation Criteria in Solid Tumors version 1.1.

\*Baseline tumor size was based on RECIST v1.1 and was available for 12 patients in the ICI-naive group and seven patients in the ICI-treated group.



**Table S4. GEP<sup>a</sup> Analysis of Baseline Tumor Samples in the Expansion Cohort of ICI-Naive Patients With Advanced Melanoma**

| GEP Level          | MK-3475-KEYNOTE-006                       |              |        |                                                     |              |        |
|--------------------|-------------------------------------------|--------------|--------|-----------------------------------------------------|--------------|--------|
|                    | MK-4166 PN001                             |              |        | Study                                               |              |        |
|                    | MK 4166 + Pembrolizumab                   |              |        | Pembrolizumab Monotherapy                           |              |        |
|                    | Combination Therapy in ICI-Naive Patients |              |        | in IPI-Naive Patients <sup>1</sup> (for comparison) |              |        |
|                    | Response Rate                             |              |        | Response Rate                                       |              |        |
|                    | <i>N</i>                                  | <i>n</i> (%) | 95% CI | <i>N</i>                                            | <i>n</i> (%) | 95% CI |
| <b>Overall</b>     | 12 <sup>b</sup>                           | 9 (75)       | 43-95  | 306                                                 | 127 (42)     | 36-47  |
| <b>GEP low</b>     |                                           |              |        |                                                     |              |        |
| (GEP < -0.318)     | 4                                         | 3 (75)       | 19-99  | 89                                                  | 20 (22)      | 14-33  |
| <b>GEP-non-low</b> |                                           |              |        |                                                     |              |        |
| (GEP ≥ -0.318)     | 8                                         | 6 (75)       | 35-97  | 217                                                 | 107 (49)     | 43-56  |

Abbreviations: GEP, gene expression profile; ICI, immune checkpoint inhibitor; IPI, ipilimumab.

<sup>a</sup>The 18-gene T-cell-inflamed GEP was developed to evaluate the combined expression pattern of IFN- $\gamma$  responsive genes linked to antigen presentation, chemokine expression, cytotoxicity, and adaptive immune resistance in the tumor microenvironment.<sup>2</sup>

<sup>b</sup>A sample from one patient in the expansion cohort was unavailable for this analysis because it did not meet quality control standards.

Data from IPI-naive patients treated with pembrolizumab monotherapy are provided for comparison.

**Figure S1. Study design.** A pretreatment tumor biopsy (archival or newly obtained) was required for enrollment. An additional biopsy was requested, but not required, in Cycle 1 between day 8 and day 15. \*Patients received the maximum-tolerated dose of MK-4166.

Abbreviation: TPI, toxicity probability interval.

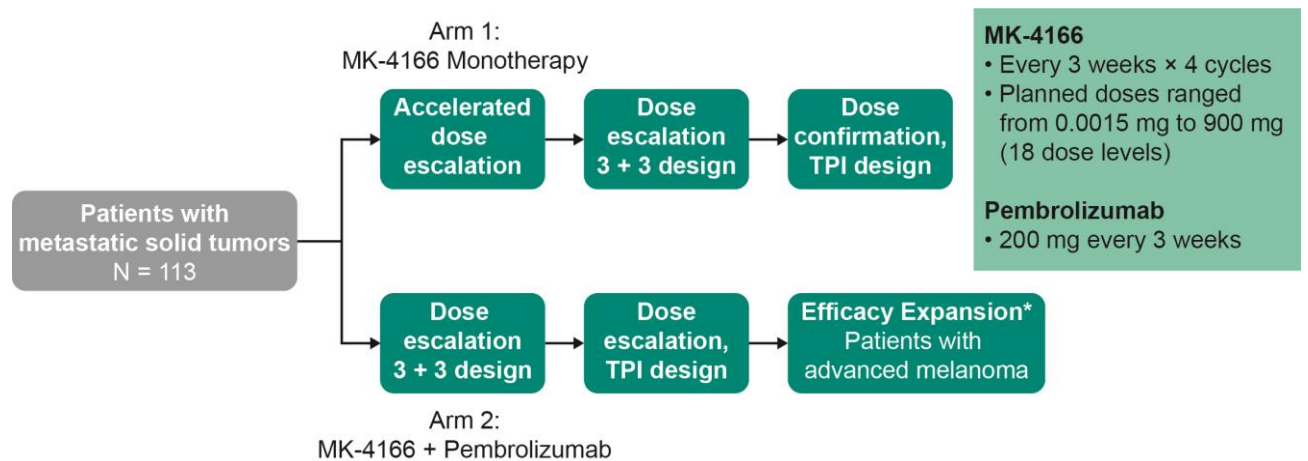

**Figure S2.** Best change in baseline tumor size in the expansion cohort in patients with advanced melanoma.

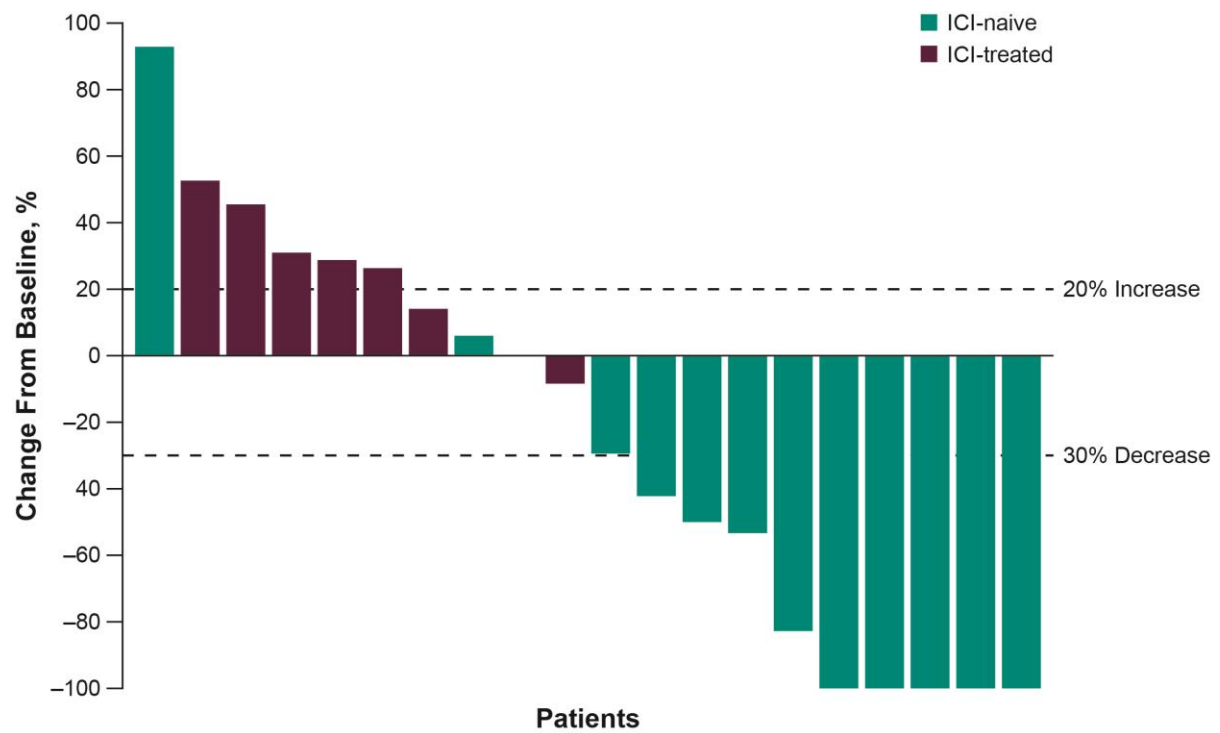

**Figure S3. Association between GEP\* status (high v low cutoff = -0.318) and tumor response in the efficacy expansion cohort of ICI-naive patients with advanced melanoma.** The 18-gene T-cell-inflamed GEP was developed to evaluate the combined expression pattern of IFN- $\gamma$  responsive genes linked to antigen presentation, chemokine expression, cytotoxicity, and adaptive immune resistance in the tumor microenvironment.<sup>2</sup> Abbreviations: CR, complete response; GEP, gene expression profile; ICI, immune checkpoint inhibitor; PR, partial response.

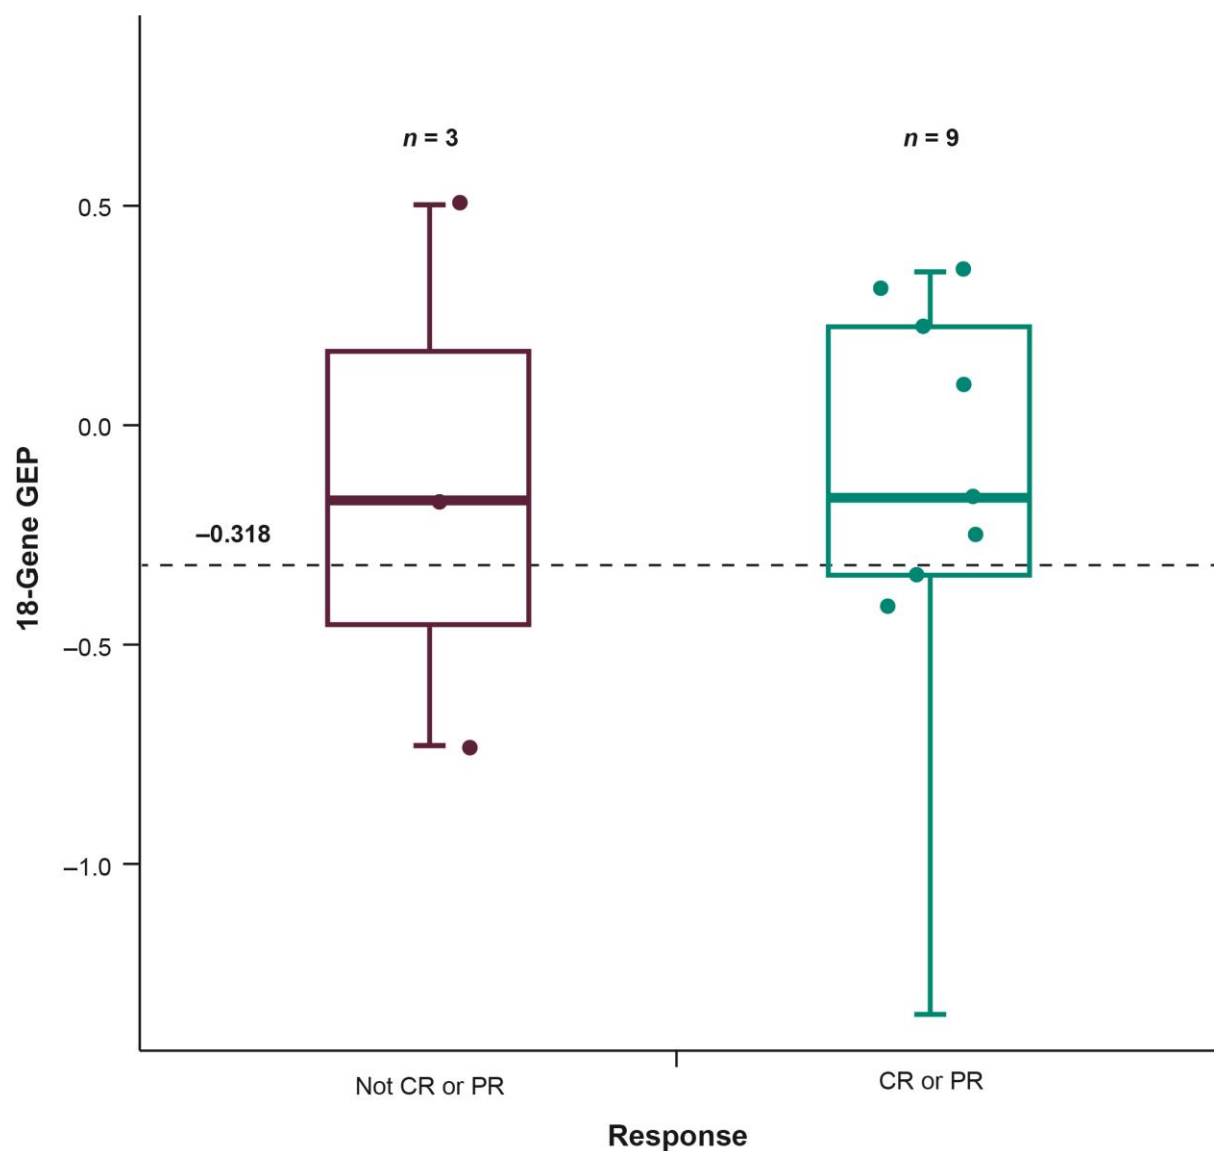

## Supplementary Reference

1. Ribas A, Robert C, Schacter K, Long GV, Arance A, Carlino MS, et al. Tumor mutational burden (TMB), T cell-inflamed gene expression profile (GEP) and PD-L1 are independently associated with response to pembrolizumab (Pembro) in patients with advanced melanoma in the KEYNOTE (KN)-006 study [abstract]. In: Proceedings of the American Association for Cancer Research Annual Meeting 2019; 2019 Mar 29-Apr 3; Atlanta, GA. Philadelphia (PA): AACR; Cancer Res 2019;79(13 Suppl):Abstract nr 4217.
2. Ayers M, Lunceford J, Nebozhyn M, Murphy E, Loboda A, Kaufman DR, et al. IFN-gamma-related mRNA profile predicts clinical response to PD-1 blockade. *J Clin Invest* 2017;127:2930–40.
